# Supplementary material for: Rehmannia glutinosa Polysaccharides: Optimization of the Decolorization Process and Antioxidant and Anti-Inflammatory Effects in LPS-Stimulated Porcine Intestinal Epithelial Cells
Source: MDPI journal article supplement (doi:10.3390/antiox12040914), 2023-04-12
Supplement: s1 [file s1]

## Supplementary data

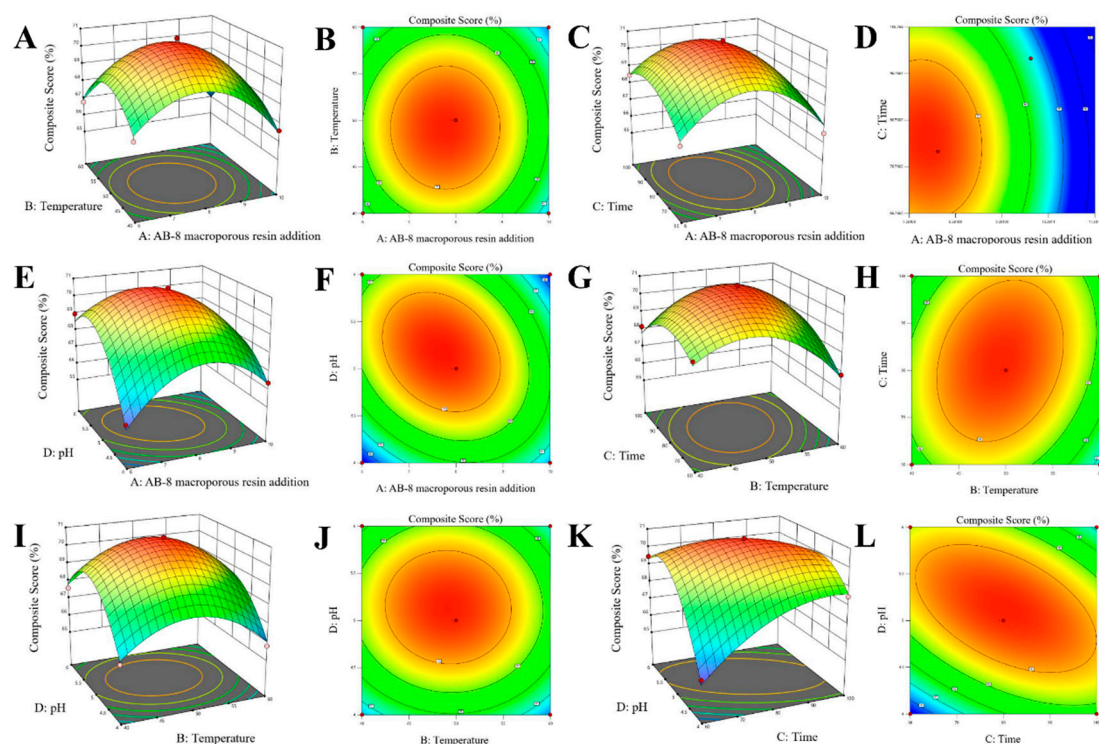

**Figure S1** Response surface and contour plots showing the interaction of different variables affecting the decolorization of RGP using AB-8 macroporous resin.

n

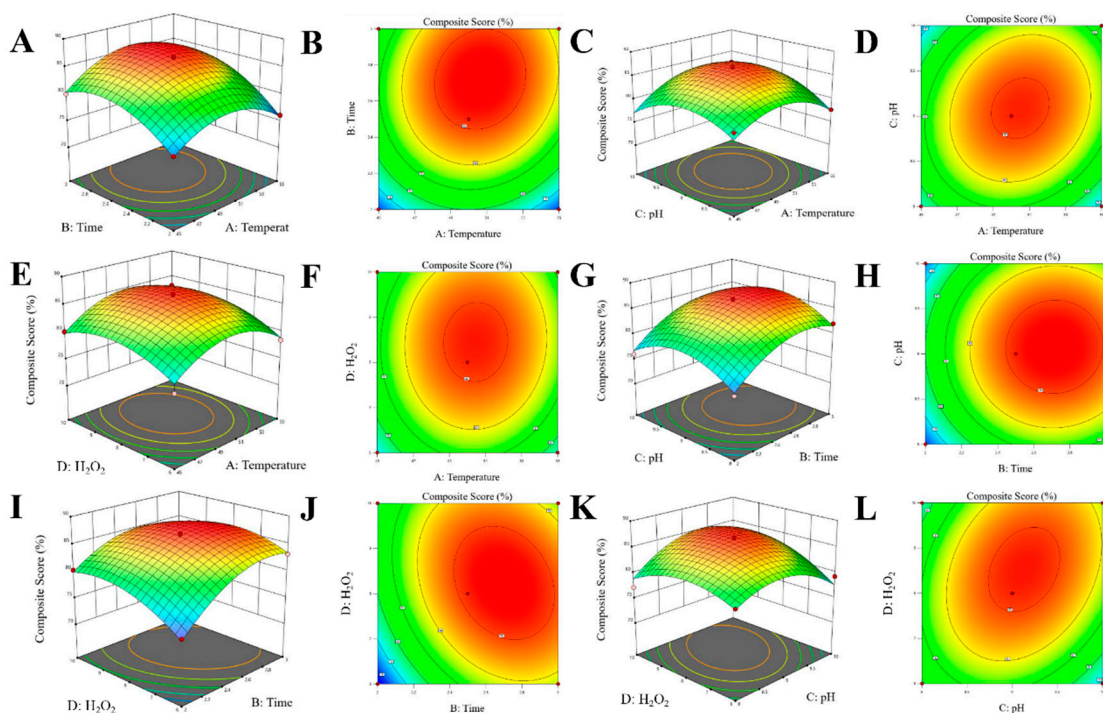

**Figure S2** Response surface and contour plots showing the interaction of different variables affecting the decolorization of RGP using  $\text{H}_2\text{O}_2$ .

**Table S1** Box–Behnken design with response values for comprehensive scores.

| Group | A  | B  | C  | D  | DR (%) | RR (%) | CS (%) |
|-------|----|----|----|----|--------|--------|--------|
| 1     | 0  | -1 | 1  | 0  | 69.64  | 66.67  | 68.16  |
| 2     | 1  | -1 | 0  | 0  | 60.52  | 72.69  | 66.61  |
| 3     | 0  | -1 | 0  | -1 | 95.24  | 37.02  | 66.13  |
| 4     | 0  | -1 | -1 | 0  | 70.75  | 66.67  | 68.71  |
| 5     | -1 | -1 | 0  | 0  | 73.34  | 61.19  | 67.27  |
| 6     | 0  | -1 | 0  | 1  | 63.26  | 71.90  | 67.58  |
| 7     | -1 | 0  | 0  | -1 | 67.10  | 63.69  | 65.39  |
| 8     | 1  | 0  | 0  | -1 | 70.14  | 62.59  | 66.37  |
| 9     | 0  | 0  | -1 | 1  | 69.05  | 69.85  | 69.45  |
| 10    | -1 | 0  | -1 | 0  | 56.77  | 77.44  | 67.10  |
| 11    | 1  | 0  | 1  | 0  | 61.73  | 71.50  | 66.62  |
| 12    | 0  | 0  | 0  | 0  | 68.05  | 72.97  | 70.51  |
| 13    | 0  | 0  | 0  | 0  | 68.02  | 73.43  | 70.73  |
| 14    | 0  | 0  | 0  | 0  | 69.22  | 72.72  | 70.97  |
| 15    | 0  | 0  | -1 | -1 | 80.53  | 50.09  | 65.31  |
| 16    | -1 | 0  | 1  | 0  | 60.80  | 76.13  | 68.47  |
| 17    | 0  | 0  | 1  | -1 | 78.03  | 58.93  | 68.48  |
| 18    | 1  | 0  | 0  | 1  | 56.73  | 74.39  | 65.56  |
| 19    | -1 | 0  | 0  | 1  | 46.89  | 91.02  | 68.95  |
| 20    | 0  | 0  | 1  | 1  | 71.11  | 61.94  | 66.53  |
| 21    | 1  | 0  | -1 | 0  | 51.01  | 82.06  | 66.54  |
| 22    | 0  | 1  | 0  | -1 | 81.33  | 50.27  | 65.80  |
| 23    | 1  | 1  | 0  | 0  | 84.73  | 47.77  | 66.25  |
| 24    | 0  | 1  | 1  | 0  | 77.53  | 60.07  | 68.80  |
| 25    | -1 | 1  | 0  | 0  | 74.13  | 59.41  | 66.77  |
| 26    | 0  | 1  | 0  | 1  | 67.97  | 65.41  | 66.69  |
| 27    | 0  | 1  | -1 | 0  | 63.34  | 70.35  | 66.85  |

A: AB-8 macroporous resin addition; B: Temperature (°C); C: Duration (min); D: pH;  
DR: Decolorization Rate (%); RR: Retention Rate (%); CS: Composite Score (%).

**Table S2** Box–Behnken design with response values for comprehensive scores.

| Group | A  | B  | C  | D  | DR (%) | RR (%) | CS (%) |
|-------|----|----|----|----|--------|--------|--------|
| 1     | -1 | -1 | 0  | 0  | 85.5   | 66.98  | 76.24  |
| 2     | -1 | 1  | 0  | 0  | 89.8   | 70.34  | 80.07  |
| 3     | 1  | -1 | 0  | 0  | 85.33  | 66.85  | 76.09  |
| 4     | 1  | 1  | 0  | 0  | 93.15  | 72.97  | 83.06  |
| 5     | 0  | 0  | -1 | -1 | 89.91  | 70.43  | 80.17  |
| 6     | 0  | 0  | -1 | 1  | 88.82  | 69.58  | 79.2   |
| 7     | 0  | 0  | 1  | -1 | 86.51  | 67.77  | 77.14  |
| 8     | 0  | 0  | 1  | 1  | 93.34  | 73.12  | 83.23  |
| 9     | -1 | 0  | 0  | -1 | 89.76  | 70.32  | 80.04  |
| 10    | -1 | 0  | 0  | 1  | 87.87  | 68.83  | 78.35  |
| 11    | 1  | 0  | 0  | -1 | 87.07  | 68.21  | 77.64  |

|    |    |    |    |    |       |       |       |
|----|----|----|----|----|-------|-------|-------|
| 12 | 1  | 0  | 0  | 1  | 92.59 | 72.53 | 82.56 |
| 13 | 0  | -1 | -1 | 0  | 84.31 | 66.05 | 75.18 |
| 14 | 0  | -1 | 1  | 0  | 90.03 | 70.53 | 80.28 |
| 15 | 0  | 1  | -1 | 0  | 93.21 | 73.01 | 83.11 |
| 16 | 0  | 1  | 1  | 0  | 92.84 | 72.72 | 82.78 |
| 17 | -1 | 0  | -1 | 0  | 85.67 | 67.11 | 76.39 |
| 18 | -1 | 0  | 1  | 0  | 89.84 | 70.38 | 80.11 |
| 19 | 1  | 0  | -1 | 0  | 87.95 | 68.89 | 78.42 |
| 20 | 1  | 0  | 1  | 0  | 93.28 | 73.06 | 83.17 |
| 21 | 0  | -1 | 0  | -1 | 84.59 | 66.27 | 75.43 |
| 22 | 0  | -1 | 0  | 1  | 85.22 | 66.76 | 75.99 |
| 23 | 0  | 1  | 0  | -1 | 91.93 | 72.01 | 81.97 |
| 24 | 0  | 1  | 0  | 1  | 93.26 | 73.06 | 83.16 |
| 25 | 0  | 0  | 0  | 0  | 96.61 | 75.67 | 86.14 |
| 26 | 0  | 0  | 0  | 0  | 97.37 | 76.27 | 86.82 |
| 27 | 0  | 0  | 0  | 0  | 96.55 | 75.63 | 86.09 |

A: Temperature (°C); B: Duration (h); C: pH; D: H<sub>2</sub>O<sub>2</sub> addition (%); DR: Decolorization Rate (%); RR: Retention Rate (%); CS: Composite Score (%).

**Table S3** Primer sequences used in quantitative real-time polymerase chain reaction.

| Gene      |                | Primer sequence 5'-3'  | PCR product size (bp) | Gene bank accession number | E    |
|-----------|----------------|------------------------|-----------------------|----------------------------|------|
| GAPDH     | Forward primer | GGAAGCTGTGGCGTGATGGC   | 175                   | NM_001206359.1             | 1.97 |
|           | Reverse primer | TTCTCCAGGCGGCAGGTCAG   |                       |                            |      |
| Bax       | Forward primer | GGTCGCGCTTTTCTACTTTGCC | 89                    | XM_013998624.2             | 1.97 |
|           | Reverse primer | TCCAGCCCATGATGGTCCT    |                       |                            |      |
| Bcl-2     | Forward primer | CCAAGATCATTCTGACGGAGT  | 229                   | XM_021099593.1             | 2.00 |
|           | Reverse primer | GGTATCATAAGCCAGCAACGAA |                       |                            |      |
| caspase-3 | Forward primer | GGAATGGCATGTCTGATCTGGT | 351                   | NM_214131.1                | 2.01 |
|           | Reverse primer | ACTGTCCGTCTCAATCCCAC   |                       |                            |      |

|               |                |                          |     |                |      |
|---------------|----------------|--------------------------|-----|----------------|------|
| caspase-8     | Forward primer | TCTGCGGACTGGATGTGATT     | 165 | XM_021074714.1 | 1.93 |
|               | Reverse primer | TCTGAGGTTGCTGGTCACAC     |     |                |      |
| caspase-9     | Forward primer | TGGAActCAAGCCAGAGGAG     | 195 | XM_013998997.2 | 1.92 |
|               | Reverse primer | CTGCATTcAGGACGTAAGCC     |     |                |      |
| Nrf2          | Forward primer | CCAATTcAGCCAGCACAAcACATC | 149 | XM_021075133.1 | 1.92 |
|               | Reverse primer | GACTGAGCCTGGTTAGGAGCAATG |     |                |      |
| Keap1         | Forward primer | GGAGGACCACACCAAGCAAGC    | 142 | NM_001114671.1 | 1.98 |
|               | Reverse primer | GGATGAAGCCAGCACCACCTTG   |     |                |      |
| NQO1          | Forward primer | GATCATACTGGCCCACTCCG     | 200 | NM_001159613.1 | 1.95 |
|               | Reverse primer | GAGCAGTCTCGGCAGGATAC     |     |                |      |
| HO-1          | Forward primer | TTGTGTCTCGTGTTCCTGCT     | 112 | NM_001004027.1 | 1.97 |
|               | Reverse primer | CCCCTCACCcACCTTGCT       |     |                |      |
| TNF- $\alpha$ | Forward primer | TTCCAGCTGGCCCCTTGAGC     | 146 | NM_214022.1    | 1.90 |
|               | Reverse primer | GAGGGCATTGGCATAccCAC     |     |                |      |
| IL-6          | Forward primer | TTCACCTCTCCGGACAAAAC     | 122 | NM_001252429.1 | 1.93 |
|               | Reverse primer | TCTGCCAGTACCTCCTTGCT     |     |                |      |
| IL-1 $\beta$  | Forward primer | GAGCTGAAGGCTCTCCACCTC    | 87  | NM_001302388.2 | 1.91 |
|               | Reverse primer | ATCGCTGTCATCTCCTTGcAC    |     |                |      |

---

|       |                |                         |     |                |      |
|-------|----------------|-------------------------|-----|----------------|------|
| NF-κB | Forward primer | AGTACCCTGAGGCTATAACTCGC | 133 | NM_001114281.1 | 2.04 |
|       | Reverse primer | TCCGCAATGGAGGAGAAGTC    |     |                |      |
| TLR4  | Forward primer | CAGATAAGCGAGGCCGTCATT   | 113 | NM_001293316.1 | 1.97 |
|       | Reverse primer | TTGCAGCCCACAAAAAGCA     |     |                |      |

---

Table S4 Program for real-time fluorescent quantitative PCR (RT-PCR)

| Reaction stage | Specific response | No. of cycles | Temperature | Duration |
|----------------|-------------------|---------------|-------------|----------|
| 1              | Predegeneration   | 1             | 95°C        | 30 s     |
| 2              | Cyclic reaction   | 40            | 95°C        | 10 s     |
|                |                   |               | 60°C        | 30 s     |
|                |                   |               | 95°C        | 15 s     |
| 3              | Melting curve     | 1             | 60°C        | 60 s     |
|                |                   |               | 95°C        | 15 s     |
